# Supplementary material for: Genomic Resources of Three Pulsatilla Species Reveal Evolutionary Hotspots, Species-Specific Sites and Variable Plastid Structure in the Family Ranunculaceae
Source: MDPI journal article supplement (doi:10.3390/ijms160922258), 2015-09-15
Supplement: s1 [file s1]

# Supplementary Information

**Table S1.** Genes found in the plastid genome of *Pulsatilla*.

| Type of Gene                                                                               | Gene Names                                                                                                                                                                                                                                                                                                                                                                                                                                                                                                                                                                                                                                                                                                                                                                                                                                                                                                                                                     |
|--------------------------------------------------------------------------------------------|----------------------------------------------------------------------------------------------------------------------------------------------------------------------------------------------------------------------------------------------------------------------------------------------------------------------------------------------------------------------------------------------------------------------------------------------------------------------------------------------------------------------------------------------------------------------------------------------------------------------------------------------------------------------------------------------------------------------------------------------------------------------------------------------------------------------------------------------------------------------------------------------------------------------------------------------------------------|
| Acetyl-CoA carboxylase                                                                     | <i>accD</i> <sup>a</sup>                                                                                                                                                                                                                                                                                                                                                                                                                                                                                                                                                                                                                                                                                                                                                                                                                                                                                                                                       |
| ATP synthase subunits                                                                      | <i>atpA</i> <sup>a</sup> , <i>atpB</i> <sup>a</sup> , <i>atpE</i> <sup>a</sup> , <i>atpF</i> <sup>a</sup> , <i>atpH</i> <sup>a</sup> , <i>atpI</i> <sup>a</sup>                                                                                                                                                                                                                                                                                                                                                                                                                                                                                                                                                                                                                                                                                                                                                                                                |
| Cytochrome B/F complex subunit                                                             | <i>petA</i> <sup>a</sup> , <i>petB</i> <sup>a</sup> , <i>petD</i> <sup>a</sup> , <i>petG</i> <sup>a</sup> , <i>petL</i> <sup>a</sup> , <i>petN</i> <sup>a</sup>                                                                                                                                                                                                                                                                                                                                                                                                                                                                                                                                                                                                                                                                                                                                                                                                |
| Cytochrome C protein                                                                       | <i>ccsA</i> <sup>a</sup>                                                                                                                                                                                                                                                                                                                                                                                                                                                                                                                                                                                                                                                                                                                                                                                                                                                                                                                                       |
| Envelope membrane protein                                                                  | <i>cemA</i> <sup>a</sup>                                                                                                                                                                                                                                                                                                                                                                                                                                                                                                                                                                                                                                                                                                                                                                                                                                                                                                                                       |
| Maturase K                                                                                 | <i>matK</i> <sup>a</sup>                                                                                                                                                                                                                                                                                                                                                                                                                                                                                                                                                                                                                                                                                                                                                                                                                                                                                                                                       |
| NADH-dehydrogenase subunits                                                                | <i>ndhA</i> <sup>a</sup> , <i>ndhB</i> <sup>c</sup> , <i>ndhC</i> <sup>a</sup> , <i>ndhD</i> <sup>a</sup> , <i>ndhE</i> <sup>a</sup> , <i>ndhF</i> <sup>a</sup> , <i>ndhG</i> <sup>a</sup> , <i>ndhH</i> <sup>a</sup> , <i>ndhI</i> <sup>a</sup> , <i>ndhJ</i> <sup>a</sup> , <i>ndhK</i> <sup>a</sup>                                                                                                                                                                                                                                                                                                                                                                                                                                                                                                                                                                                                                                                         |
| Photosystem I subunits                                                                     | <i>psaA</i> <sup>a</sup> , <i>psaB</i> <sup>a</sup> , <i>psaC</i> <sup>a</sup> , <i>psaI</i> <sup>a</sup> , <i>psaJ</i> <sup>a</sup>                                                                                                                                                                                                                                                                                                                                                                                                                                                                                                                                                                                                                                                                                                                                                                                                                           |
| Photosystem II subunits                                                                    | <i>psbA</i> <sup>a,d</sup> , <i>psbB</i> <sup>a</sup> , <i>psbC</i> <sup>a</sup> , <i>psbD</i> <sup>a</sup> , <i>psbE</i> <sup>a</sup> , <i>psbF</i> <sup>a</sup> , <i>psbH</i> <sup>a</sup> , <i>psbI</i> <sup>a</sup> , <i>psbJ</i> <sup>a</sup> , <i>psbK</i> <sup>a</sup> , <i>psbL</i> <sup>a</sup> , <i>psbM</i> <sup>a</sup> , <i>psbN</i> <sup>a</sup> , <i>psbT</i> <sup>a</sup> , <i>psbZ</i> <sup>a</sup>                                                                                                                                                                                                                                                                                                                                                                                                                                                                                                                                           |
| Ribosomal RNAs                                                                             | <i>rrn16</i> <sup>c</sup> , <i>rrn23</i> <sup>c</sup> , <i>rrn4.5</i> <sup>c</sup> , <i>rrn5</i> <sup>c</sup>                                                                                                                                                                                                                                                                                                                                                                                                                                                                                                                                                                                                                                                                                                                                                                                                                                                  |
| RNA polymerase subunits                                                                    | <i>rpoA</i> <sup>a</sup> , <i>rpoB</i> <sup>a</sup> , <i>rpoC1</i> <sup>a</sup> , <i>rpoC2</i> <sup>a</sup>                                                                                                                                                                                                                                                                                                                                                                                                                                                                                                                                                                                                                                                                                                                                                                                                                                                    |
| Rubisco large subunits                                                                     | <i>rbcL</i> <sup>a</sup>                                                                                                                                                                                                                                                                                                                                                                                                                                                                                                                                                                                                                                                                                                                                                                                                                                                                                                                                       |
| Small ribosomal protein units                                                              | <i>rps2</i> <sup>a</sup> , <i>rps3</i> <sup>c</sup> , <i>rps4</i> <sup>a</sup> , <i>rps7</i> <sup>c</sup> , <i>rps8</i> <sup>c</sup> , <i>rps11</i> <sup>a</sup> , <i>rps14</i> <sup>a</sup> , <i>rps15</i> <sup>a</sup> , <i>rps16</i> <sup>a</sup> , <i>rps18</i> <sup>a</sup> , <i>rps19</i> <sup>c</sup>                                                                                                                                                                                                                                                                                                                                                                                                                                                                                                                                                                                                                                                   |
| Large ribosomal protein units                                                              | <i>rpl2</i> <sup>c</sup> , <i>rpl14</i> <sup>c</sup> , <i>rpl16</i> <sup>c</sup> , <i>rpl20</i> <sup>a</sup> , <i>rpl22</i> <sup>c</sup> , <i>rpl23</i> <sup>c</sup> , <i>rpl33</i> <sup>a</sup> , <i>rpl36</i> <sup>a</sup>                                                                                                                                                                                                                                                                                                                                                                                                                                                                                                                                                                                                                                                                                                                                   |
| Hypothetical genes                                                                         | <i>ycf1</i> <sup>cd</sup> , <i>ycf2</i> <sup>c</sup> , <i>ycf3</i> <sup>a</sup> , <i>ycf4</i> <sup>a</sup>                                                                                                                                                                                                                                                                                                                                                                                                                                                                                                                                                                                                                                                                                                                                                                                                                                                     |
| Transfer RNAs                                                                              | <i>trnA</i> -UGC <sup>c</sup> , <i>trnC</i> -GCA <sup>a</sup> , <i>trnD</i> -GUC <sup>a</sup> , <i>trnE</i> -UUC <sup>a</sup> , <i>trnF</i> -GAA <sup>a</sup> , <i>trnG</i> -GCC <sup>a</sup> , <i>trnG</i> -UUC <sup>a</sup> , <i>trnH</i> -GUG <sup>c</sup> , <i>trnI</i> -CAU <sup>c</sup> , <i>trnI</i> -GAU <sup>c</sup> , <i>trnK</i> -UUU <sup>a</sup> , <i>trnL</i> -CAA <sup>c</sup> , <i>trnL</i> -UAA <sup>a</sup> , <i>trnL</i> -UAG <sup>a</sup> , <i>trnMf</i> -CAU <sup>a</sup> , <i>trnN</i> -GUU <sup>c</sup> , <i>trnP</i> -GGG <sup>a</sup> , <i>trnP</i> -UGG <sup>a</sup> , <i>trnQ</i> -UUG <sup>a</sup> , <i>trnR</i> -ACG <sup>c</sup> , <i>trnR</i> -UCU <sup>a</sup> , <i>trnS</i> -GCU <sup>a</sup> , <i>trnS</i> -GGA <sup>a</sup> , <i>trnS</i> -UGA <sup>a</sup> , <i>trnT</i> -GGU <sup>a</sup> , <i>trnV</i> -GAC <sup>c</sup> , <i>trnV</i> -UAC <sup>a</sup> , <i>trnW</i> -CCA <sup>a</sup> , <i>trnY</i> -GUA <sup>a</sup> |
| Other genes (translational initiation factor A and photosystem II protein Z, respectively) | <i>clpP</i> <sup>a</sup> , <i>infA</i> <sup>a,b</sup> , <i>lhbA</i> <sup>a</sup>                                                                                                                                                                                                                                                                                                                                                                                                                                                                                                                                                                                                                                                                                                                                                                                                                                                                               |

<sup>a</sup> Genes located in single-copy regions (SC); <sup>b</sup> Pseudogene; <sup>c</sup> Gene located in the inverted repeats (IR); <sup>d</sup> Two copies, one functional and one pseudogene.

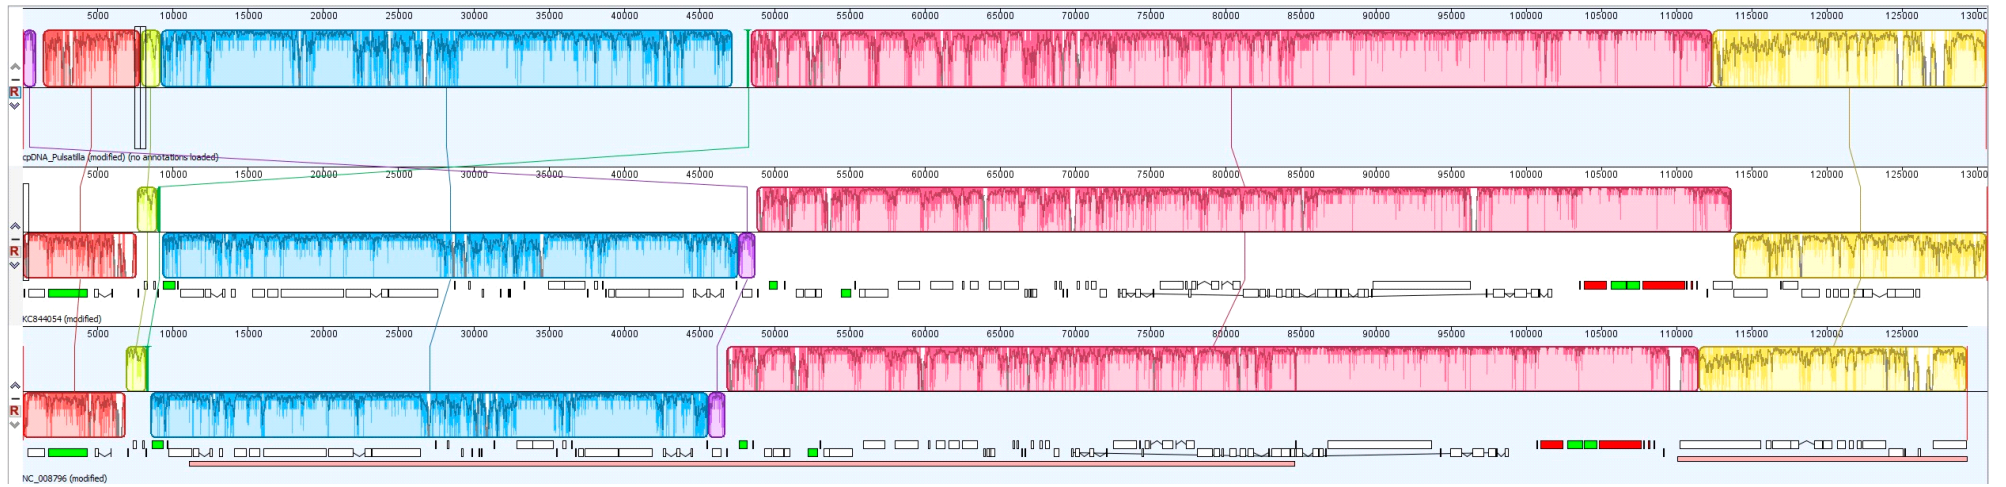

**Figure S1.** Mauve alingmnet of the three Ranunculaceae genomes. Each of locally collinear blocks is coded in different color.
